# Supplementary material for: A Peptide-Based Trap for Metal Ions Studied by Electron Paramagnetic Resonance
Source: MDPI journal article supplement (doi:10.3390/chemosensors10020071), 2022-02-10
Supplement: s1 [file s1]

Archive with 1 entries (1 files):
- chemosensors-1532050-supplementary.pdf
